# Supplementary material for: Risk of adverse events after covid-19 in Danish children and adolescents and effectiveness of BNT162b2 in adolescents: cohort study
Source: PubMed Central journal article supplement — BMJ. 2022 Apr 11;377:e068898. doi: 10.1136/bmj-2021-068898 (PMC8995669; doi:10.1136/bmj-2021-068898), 2022-04-11
Supplement: kilh068898.ww.pdf [file kilh068898.ww.pdf]

## **Supplementary material**

Supplement to: Kildegaard H, Lund LC, Højlund M, Stensballe LG, Pottegård A. Comprehensive assessment of paediatric SARS-CoV-2 infection: a Danish population-based cohort study.

## Appendix

### Figures

Figure S1: Weekly share of total SARS-CoV-2 tests that were positive during the epidemic

Figure S2: Bar charts of health care utilization 1 to 6 months following SARS-CoV-2 infection

### Tables

Table S1. ICD-10 and ATC codes used to define outcomes

Table S2. ICD-10 and ATC codes used to define baseline covariates

Table S3. Estimated percentage of individuals tested for SARS-CoV-2 of the total Danish child population evaluated on 1 October 2021, stratified age.

Table S4. Absolute risks of main study outcomes stratified by SARS-CoV-2 variant

Table S5. Baseline characteristics of SARS-CoV-2 positive cases and children and adolescents in the reference cohort before and after propensity score weighting.

Table S6. Rates of health care utilisation

Table S7. Baseline characteristics of SARS-CoV-2 positive and test-negative children and adolescents before and after propensity score weighting.

Table S8. Absolute risks, adjusted risk differences and risk ratios for outcomes during follow-up in SARS-CoV-2 positive children and a comparator cohort of SARS-CoV-2 test-negative children and adolescents.

Table S9. Rates of health care services 6 months to 1 month before and 1 to 6 months after the index date in SARS-CoV-2 positive and test-negative children and adolescents.

Table S10. Demographic characteristics of overall Danish vaccine recipients aged 12 to 17 years

Table S11. Demographic characteristics of BNT162b2 vaccine recipients included in analyses

Table S12. Effectiveness of the BNT162b2 vaccine among adolescents 12 through 17 years.

Table S13. Rates of PCR-testing against SARS-CoV-2 in vaccinated and unvaccinated adolescents.

**Figure S1: Weekly share of total SARS-CoV-2 tests that were positive during the epidemic**

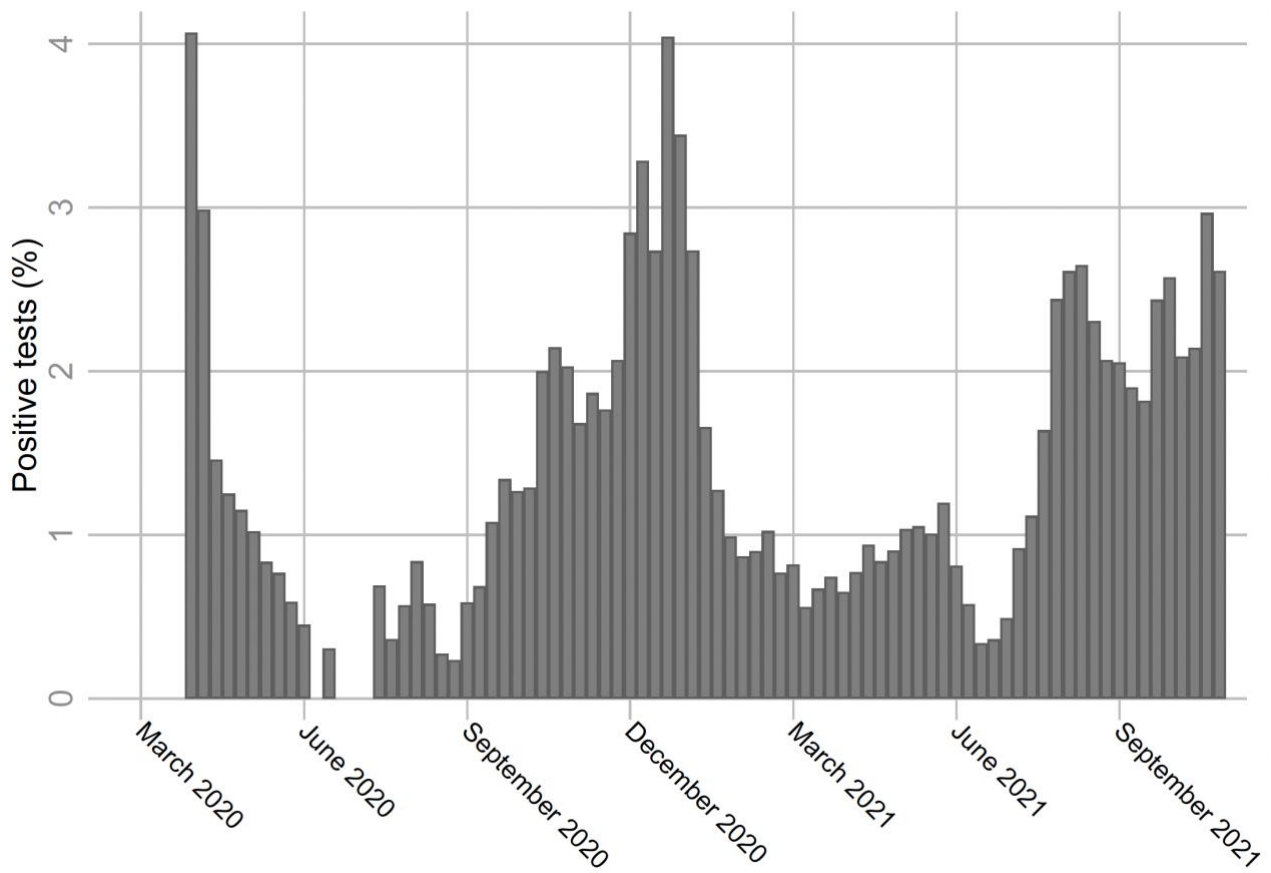

The weekly number of PCR-test confirmed paediatric SARS-CoV-2 cases as a share of the total number of PCR-tests performed in individuals <18 years. Weeks with less than five paediatric cases are not reported due to Danish privacy regulation.

**Figure S2. Bar chart of health care utilisation**

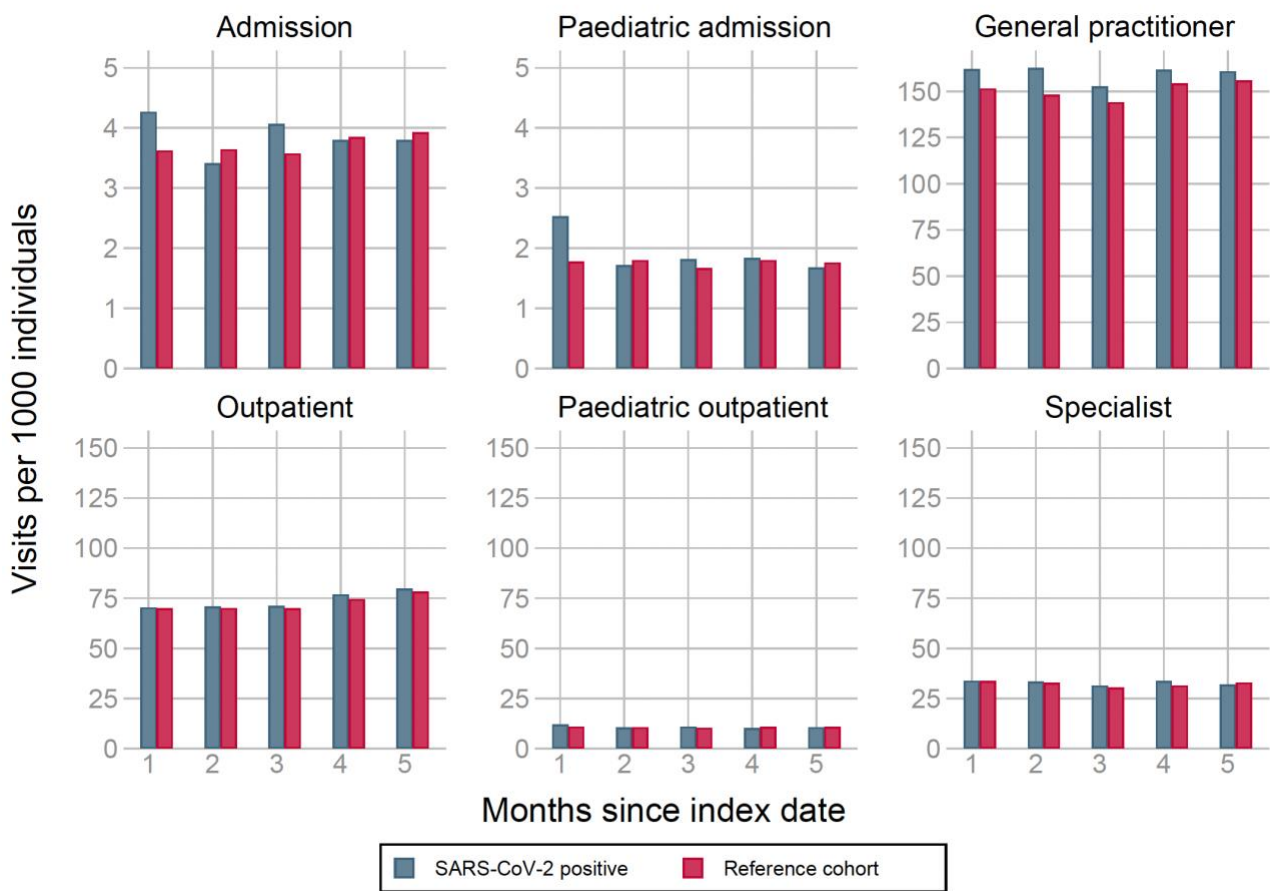

The figure illustrates the monthly rates for six types of healthcare visits during follow up among SARS-CoV-2 positive children and the reference cohort. Each bar illustrates the monthly rate, e.g. month 1 is day 30-59, month 2 day 60-89 and so forth.

Admission = Physical hospital contact with a duration of 12 hours or more.

Outpatient = Physical hospital contact with a duration of less than 6 hours.

Specialist = Visit at a primary care dermatologist, ENT-specialist or ophthalmologist.

**Table S1. ICD-10 and ATC codes used to define outcomes**

|                                                                      | <b>Coding system</b> | <b>Codes</b>                                        |
|----------------------------------------------------------------------|----------------------|-----------------------------------------------------|
| <b>Diagnosis-based outcomes</b>                                      |                      |                                                     |
| Myocarditis                                                          | ICD-10               | I40, I41, I514                                      |
| MIS-C†                                                               | ICD-10               | B972B, M303                                         |
| Venous thromboembolism                                               | ICD-10               | I26, I801, I802, I803, I808, I809, I822, I823, I829 |
| Pneumonia                                                            | ICD-10               | A481, B012, J12-J18, J100                           |
| Guillain-Barré syndrome                                              | ICD-10               | G610                                                |
| Encephalitis                                                         | ICD-10               | A858, A869, G04-05                                  |
| Other neuroimmune disorders                                          | ICD-10               | G35, G360, G368, G369, G373, G378, G379, H46        |
| Hospital referral for suspicion of sequelae after COVID-19 infection | ICD-10               | B948A, Z038Q                                        |
| <b>Medication outcomes</b>                                           |                      |                                                     |
| Short-acting beta2-agonists                                          | ATC                  | R03AC02-4, R03AL01-02, R03CC02                      |
| Inhaled corticosteroids                                              | ATC                  | R03BA, R03AK, R03AL08, R03AL09                      |
| Paracetamol                                                          | ATC                  | N02BE01                                             |
| NSAIDs                                                               | ATC                  | M01 excl. M01AX                                     |
| Antibiotics for respiratory tract infections                         | ATC                  | J01CA04, J01CE02, J01CR02, J01FA                    |
| Other antibiotics                                                    | ATC                  | J01 excl. J01CE02, J01CA04, J01CR02, J01FA          |

Information on diagnoses representing possible complications from SARS-CoV-2 infection was obtained from inpatient and outpatient hospital diagnoses recorded in the Danish National Patient Registry.<sup>1</sup> Use of prescription drugs was identified from the Danish National Prescription Registry.<sup>2</sup> †MIS-C is a combined endpoint of MIS-C and Kawasaki disease. The ICD-10 diagnosis code for MIS-C was not implemented in Denmark until April 1, 2021. Therefore, cases of Kawasaki disease occurring within two months of SARS-CoV-2 infection were considered as MIS-C.

**Abbreviations:**

ICD-10 = International Classification of Diseases and Health Related Problems, 10th revision

ATC = Anatomical Therapeutic Chemical Classification

MIS-C = Multisystem inflammatory syndrome in children

COVID-19 = Coronavirus disease 2019.

NSAIDs = Non-steroidal anti-inflammatory drugs.

**Table S2. ICD-10 and ATC codes used to define baseline covariates**

|                                                          | Coding system | Codes                                                                                                                                                                                                                                                                                                 |
|----------------------------------------------------------|---------------|-------------------------------------------------------------------------------------------------------------------------------------------------------------------------------------------------------------------------------------------------------------------------------------------------------|
| <b>Perinatal history</b>                                 |               |                                                                                                                                                                                                                                                                                                       |
| Prematurity                                              | ICD-10        | P073                                                                                                                                                                                                                                                                                                  |
| Immaturity                                               | ICD-10        | P072                                                                                                                                                                                                                                                                                                  |
| Small for gestational age                                | ICD-10        | P050                                                                                                                                                                                                                                                                                                  |
| Low birth weight                                         | ICD-10        | P070, P071                                                                                                                                                                                                                                                                                            |
| <b>Comorbidities</b>                                     |               |                                                                                                                                                                                                                                                                                                       |
| Asthma                                                   | ICD-10        | J45-46                                                                                                                                                                                                                                                                                                |
| Other chronic respiratory diseases                       | ICD-10        | E84, J41-44, J47, J84, P27                                                                                                                                                                                                                                                                            |
| Chronic cardiac disease                                  | ICD-10        | I05-08, I20-28, I34-37, I42-49, I50-51                                                                                                                                                                                                                                                                |
| Renal disease                                            | ICD-10        | N03, N05, N07, N18, N19, N25-27                                                                                                                                                                                                                                                                       |
| Diabetes                                                 | ICD-10        | E10-14                                                                                                                                                                                                                                                                                                |
| Autoimmune disease, not including diabetes               | ICD-10        | D510, D590, D591, D690, D693, D86<br>E035, E039, E050, E055, E059, E063, E065, E271, E272, E310<br>G04, G131, G35, G36, G61, G700<br>H20<br>I00-I02<br>K50, K51, K732, K743, K900<br>L10, L12, L130, L40, L63, L80<br>M05-06, M08, M30, M311, M313, M315-7, M32-34, M350-M353,<br>M358-M359, M45, M60 |
| Epilepsy or convulsions                                  | ICD-10        | G40, R56                                                                                                                                                                                                                                                                                              |
| Congenital malformations and chromosomal abnormalities   | ICD-10        | Q00-07, Q20-28, Q30-34, Q60-64, Q90-99                                                                                                                                                                                                                                                                |
| Malignancy or immunodeficiency                           | ICD-10        | C00-96, D70-72, D730, D81-84                                                                                                                                                                                                                                                                          |
| Psychiatric disorder                                     | ICD-10        | Any chapter F diagnosis                                                                                                                                                                                                                                                                               |
| <b>Current drug use</b>                                  |               |                                                                                                                                                                                                                                                                                                       |
| Short-acting beta2-agonists                              | ATC           | R03AC02-4, R03AL01-02, R03CC02                                                                                                                                                                                                                                                                        |
| Inhaled corticosteroids                                  | ATC           | R03BA, R03AK, R03AL08, R03AL09                                                                                                                                                                                                                                                                        |
| Leukotrine D4-receptor antagonists                       | ATC           | R03DC                                                                                                                                                                                                                                                                                                 |
| Nasal corticosteroids                                    | ATC           | R01AD                                                                                                                                                                                                                                                                                                 |
| Systemic antihistamines                                  | ATC           | R06A                                                                                                                                                                                                                                                                                                  |
| Systemic corticosteroids                                 | ATC           | H02AB                                                                                                                                                                                                                                                                                                 |
| Systemic antibiotics, no. of prescription fills (0,1,+2) | ATC           | J01                                                                                                                                                                                                                                                                                                   |
| Paracetamol                                              | ATC           | N02BE01                                                                                                                                                                                                                                                                                               |
| NSAIDs                                                   | ATC           | M01 excl. M01AX                                                                                                                                                                                                                                                                                       |

Information on medical history was obtained from inpatient and outpatient hospital diagnoses recorded in the Danish National Patient Registry.<sup>1</sup> Use of prescription drugs was identified from the Danish National Prescription Registry.<sup>2</sup>

Abbreviations:

ICD-10 = International Classification of Diseases and Health Related Problems, 10th revision

ATC = Anatomical Therapeutic Chemical Classification

NSAIDs = Non-steroidal anti-inflammatory drugs.

**Table S3: Estimated percentage of individuals tested for SARS-CoV-2 of the total Danish child population evaluated on 1 October 2021, stratified on age.**

| Age | Tested (N) | Residents (N) | Tested (%) |
|-----|------------|---------------|------------|
| 0   | 7328       | 62551         | 12         |
| 1   | 31836      | 61708         | 52         |
| 2   | 44475      | 61819         | 72         |
| 3   | 45265      | 62628         | 72         |
| 4   | 47272      | 62063         | 76         |
| 5   | 49156      | 62658         | 78         |
| 6   | 48585      | 59239         | 82         |
| 7   | 50302      | 58674         | 86         |
| 8   | 52176      | 59497         | 88         |
| 9   | 53997      | 60761         | 89         |
| 10  | 57486      | 63632         | 90         |
| 11  | 61165      | 66795         | 92         |
| 12  | 62020      | 67160         | 92         |
| 13  | 64221      | 69256         | 93         |
| 14  | 63590      | 67691         | 94         |
| 15  | 65084      | 68881         | 94         |
| 16  | 65436      | 68548         | 95         |
| 17  | 65501      | 68288         | 96         |

Number of Danish residents under 18 years of age RT-PCR-tested for SARS-CoV-2 at some point until 1 October 2021 as a percentage of the total number of Danish residents < 18 years of age, evaluated on 1 October 2021. The total number of Danish residents under 18 years of age was obtained from Statistics Denmark.<sup>3</sup> Age was evaluated on 1 October 2021 and not on the date of testing to correspond to population numbers obtained from Statistics Denmark. Therefore, the total number of individuals tested for SARS-CoV-2 is less than the number listed in the main paper as adolescents who turned 18 years during the study period are not included in this estimation.

**Table S4: Absolute risks of main study outcomes stratified by SARS-CoV-2 variant**

| Outcome                                      | Any variant |                   | B.1.177   |                   | Alpha variant |                   | Delta variant |                   |
|----------------------------------------------|-------------|-------------------|-----------|-------------------|---------------|-------------------|---------------|-------------------|
|                                              | Events      | Risk (%)          | Events    | Risk (%)          | Events        | Risk (%)          | Events        | Risk (%)          |
| Hospital admission                           | 361/74350   | 0.49 (0.44, 0.54) | 153/30798 | 0.50 (0.42, 0.58) | 98/20102      | 0.49 (0.40, 0.59) | 80/16649      | 0.48 (0.38, 0.60) |
| MIS-C†                                       | 32/70666    | 0.05 (0.03, 0.06) | 11/30888  | 0.04 (0.02, 0.06) | 9/20164       | 0.04 (0.02, 0.08) | 5/12778       | 0.04 (0.01, 0.09) |
| Long-COVID                                   | 58/48948    | 0.12 (0.09, 0.15) | 44/30894  | 0.14 (0.10, 0.19) | 7/13009       | 0.05 (0.02, 0.11) | -             | -                 |
| <b>Initiation of prescription drugs</b>      |             |                   |           |                   |               |                   |               |                   |
| Short-acting beta-2 agonists                 | 608/46728   | 1.30 (1.20, 1.41) | 328/29498 | 1.11 (1.00, 1.24) | 202/12434     | 1.62 (1.41, 1.86) | -             | -                 |
| Inhaled corticosteroids                      | 292/47163   | 0.62 (0.55, 0.69) | 169/29741 | 0.57 (0.49, 0.66) | 79/12573      | 0.63 (0.50, 0.78) | -             | -                 |
| Paracetamol                                  | 338/47620   | 0.71 (0.64, 0.79) | 248/30099 | 0.82 (0.72, 0.93) | 61/12648      | 0.48 (0.37, 0.62) | -             | -                 |
| NSAIDs                                       | 433/47821   | 0.91 (0.82, 0.99) | 280/30146 | 0.93 (0.82, 1.04) | 104/12731     | 0.82 (0.67, 0.99) | -             | -                 |
| Antibiotics for respiratory Tract infections | 1306/44072  | 2.96 (2.81, 3.13) | 679/27604 | 2.46 (2.28, 2.65) | 493/12011     | 4.10 (3.76, 4.47) | -             | -                 |
| Other antibiotics                            | 790/46701   | 1.69 (1.58, 1.81) | 510/29381 | 1.74 (1.59, 1.89) | 200/12479     | 1.60 (1.39, 1.84) | -             | -                 |

Absolute risks of hospital-based, diagnosis-based outcomes, and initiation of new medication during follow-up in SARS-CoV-2 positive children and a reference cohort sampled among children tested for SARS-CoV-2, stratified by dominating SARS-CoV-2 variant. Periods of dominating SARS-CoV-2 strain was defined based on Danish large-scale genome sequencing of SARS-CoV-2 provided by the Global Initiative in Sharing All Influenza Data to <https://covariants.org/per-country>.<sup>4</sup> Because of limited number of events, stratification on SARS-CoV-2 variant was not possible for all study outcomes. Evaluation of Long-COVID and initiation of prescription drugs required six months of follow-up and was therefore not possible for the period dominated by the delta variant. MIS-C=Multisystem inflammatory syndrome in children. NSAIDs= non-steroidal anti-inflammatory drugs.



**Table S5. Baseline characteristics of SARS-CoV-2 positive cases and children and adolescents in the reference cohort before and after propensity score weighting.**

|                                                        | SARS-CoV-2 positive<br>(n=74,611) | Reference<br>(n=920,893) | SMD  | Reference (weighted)<br>(n=74,559) | SMD  |
|--------------------------------------------------------|-----------------------------------|--------------------------|------|------------------------------------|------|
| <b>Demographics</b>                                    |                                   |                          |      |                                    |      |
| Median age (IQR)                                       | 11 (7-15)                         | 10 (5-14)                | 0.22 | 11 (7-15)                          | 0    |
| Age category (years)                                   |                                   |                          |      |                                    |      |
| 0-1                                                    | 3,369 (4.5)                       | 59,481 (6.5)             | 0.09 | 2,759 (3.7)                        | 0.04 |
| 2-5                                                    | 9,665 (13)                        | 181,411 (20)             | 0.18 | 10,984 (15)                        | 0.05 |
| 6-11                                                   | 26,641 (36)                       | 315,599 (34)             | 0.03 | 25,229 (34)                        | 0.04 |
| 12-15                                                  | 21,689 (29)                       | 243,994 (26)             | 0.06 | 22,735 (30)                        | 0.03 |
| 16-17                                                  | 13,247 (18)                       | 120,408 (13)             | 0.13 | 12,853 (17)                        | 0.01 |
| Female sex                                             | 36,488 (49)                       | 449,017 (49)             | 0    | 36,474 (49)                        | 0    |
| Immigration status                                     |                                   |                          |      |                                    |      |
| 1st generation                                         | 4,846 (6.5)                       | 29,941 (3.3)             | 0.15 | 4,847 (6.5)                        | 0    |
| 2nd generation                                         | 15,571 (21)                       | 81,428 (8.8)             | 0.34 | 15,497 (21)                        | 0    |
| <b>Temporality</b>                                     |                                   |                          |      |                                    |      |
| 27 Feb 2020 to 31 Jul 2020                             | 921 (1.2)                         | 11,646 (1.3)             | 0    | 938 (1.3)                          | 0    |
| 01 Aug 2021 to 31 Jan 2021                             | 35,027 (47)                       | 437,076 (47)             | 0.01 | 35,364 (47)                        | 0.01 |
| 01 Feb 2021 to 30 Jun 2021                             | 20,701 (28)                       | 257,486 (28)             | 0    | 20,827 (28)                        | 0    |
| 01 Jul 2021 to 31 Oct 2021                             | 17,962 (24)                       | 214,685 (23)             | 0.02 | 17,430 (23)                        | 0.02 |
| <b>Perinatal history</b>                               |                                   |                          |      |                                    |      |
| Prematurity (28-37 weeks)                              | 3,182 (4.3)                       | 44,277 (4.8)             | 0.03 | 3,320 (4.5)                        | 0.01 |
| Immaturity (<28 weeks)                                 | NR                                | 2,152 (0.2)              | NR   | 172 (0.2)                          | NR   |
| Small for gestational age                              | 868 (1.2)                         | 13,000 (1.4)             | 0.02 | 865 (1.2)                          | 0    |
| Low birth weight (<2500g)                              | 2,160 (2.9)                       | 28,502 (3.1)             | 0.01 | 2,159 (2.9)                        | 0    |
| <b>Medical history</b>                                 |                                   |                          |      |                                    |      |
| Asthma                                                 | 4,040 (5.4)                       | 50,568 (5.5)             | 0    | 4,031 (5.4)                        | 0    |
| Other chronic respiratory diseases                     | 470 (0.6)                         | 6,488 (0.7)              | 0.01 | 471 (0.6)                          | 0    |
| Chronic cardiac disease                                | 362 (0.5)                         | 4,046 (0.4)              | 0.01 | 360 (0.5)                          | 0    |
| Diabetes mellitus                                      | NR                                | 2,664 (0.3)              | NR   | 192 (0.3)                          | NR   |
| Autoimmune disorders                                   | 854 (1.1)                         | 9,991 (1.1)              | 0.01 | 854 (1.1)                          | 0    |
| Epilepsy or convulsions                                | 3,159 (4.2)                       | 40,062 (4.4)             | 0.01 | 3,152 (4.2)                        | 0    |
| Congenital malformations and chromosomal abnormalities | 1,971 (2.6)                       | 25,127 (2.7)             | 0.01 | 1,966 (2.6)                        | 0    |
| Malignancy or immunodeficiency                         | 343 (0.5)                         | 4,179 (0.5)              | 0    | 340 (0.5)                          | 0    |
| Psychiatric disorders                                  | 4,564 (6.1)                       | 63,844 (6.9)             | 0.03 | 4,569 (6.1)                        | 0    |
| Number of comorbidities                                |                                   |                          |      |                                    |      |
| 0                                                      | 58,134 (78)                       | 706,834 (77)             | 0.03 | 58,091 (78)                        | 0    |
| 1                                                      | 12,254 (16)                       | 156,760 (17)             | 0.02 | 12,192 (16)                        | 0    |
| 2+                                                     | 4,223 (5.7)                       | 57,299 (6.2)             | 0.02 | 4,276 (5.7)                        | 0    |
| Hospital admissions within the last year               |                                   |                          |      |                                    |      |
| 0                                                      | 74,350 (100)                      | 917,118 (100)            | 0.01 | 74,295 (100)                       | 0    |
| 1                                                      | NR                                | 3,543 (0.4)              | NR   | 248 (0.3)                          | NR   |
| 2+                                                     | NR                                | 232 (0.0)                | NR   | 16 (0.0)                           | NR   |
| <b>Current drug use</b>                                |                                   |                          |      |                                    |      |
| Short-acting beta-2 agonists                           | 3,023 (4.1)                       | 44,040 (4.8)             | 0.04 | 3,020 (4.1)                        | 0    |
| Inhaled corticosteroids                                | 2,501 (3.4)                       | 33,142 (3.6)             | 0.01 | 2,501 (3.4)                        | 0    |
| Leukotriene D4-receptor antagonists                    | 433 (0.6)                         | 6,000 (0.7)              | 0.01 | 433 (0.6)                          | 0    |
| Nasal corticosteroids                                  | 3,409 (4.6)                       | 38,766 (4.2)             | 0.02 | 3,410 (4.6)                        | 0    |
| Systemic antihistamines                                | 3,508 (4.7)                       | 42,929 (4.7)             | 0    | 3,510 (4.7)                        | 0    |

|                          |             |              |      |             |    |
|--------------------------|-------------|--------------|------|-------------|----|
| Systemic corticosteroids | NR          | 1,661 (0.2)  | NR   | 163 (0.2)   | NR |
| Systemic antibiotics     |             |              |      |             |    |
| 0                        | 65,820 (88) | 813,554 (88) | 0    | 65,776 (88) | 0  |
| 1                        | 6,130 (8.2) | 74,262 (8.1) | 0.01 | 6,124 (8.2) | 0  |
| 2+                       | 2,661 (3.6) | 33,077 (3.6) | 0    | 2,659 (3.6) | 0  |
| Paracetamol              | 1,705 (2.3) | 22,634 (2.5) | 0.01 | 1,704 (2.3) | 0  |
| NSAIDs                   | 1,610 (2.2) | 18,990 (2.1) | 0.01 | 1,605 (2.2) | 0  |
| Number of unique drugs   |             |              |      |             |    |
| 0                        | 41,617 (56) | 506,281 (55) | 0.02 | 41,753 (56) | 0  |
| 1                        | 16,411 (22) | 208,584 (23) | 0.02 | 16,385 (22) | 0  |
| 2+                       | 16,583 (22) | 206,028 (22) | 0    | 16,422 (22) | 0  |

Data are n(%) unless stated otherwise. SMD=standardized mean difference. IQR=Interquartile range. NR=not reported because of Danish data protection laws. NSAIDs=non-steroidal anti-inflammatory drugs. †Defined as having redeemed a prescription for the drug of interest during one year prior to the start of follow-up.

**Table S6 Risk of health care utilisation**

The table provides the number of individuals with six types of healthcare visits during one to six months of follow up among SARS-CoV-2 positive children and the reference cohort.

| Visit type            | SARS-CoV-2 positive<br>(N=48,962) |         | Reference<br>(N=608,013) |         |
|-----------------------|-----------------------------------|---------|--------------------------|---------|
|                       | Events                            | Risk, % | Events                   | Risk, % |
| Admission             | 775                               | 1.6     | 9369                     | 1.5     |
| Paediatric admission  | 400                               | 0.8     | 4584                     | 0.8     |
| General practitioner  | 20616                             | 42.1    | 247620                   | 40.7    |
| Outpatient            | 9062                              | 18.5    | 111810                   | 18.4    |
| Paediatric outpatient | 1910                              | 3.9     | 23954                    | 3.9     |
| Specialist            | 5271                              | 10.8    | 65348                    | 10.7    |

Admission = Physical hospital contact with a duration of 12 hours or more.

Outpatient = Physical hospital contact with a duration of less than 6 hours.

Specialist = Visit at a primary care dermatologist, ENT-specialist or ophthalmologist.

Information on inpatient and outpatient hospital visits was obtained from the Danish National Patient Registry.<sup>1</sup> Data on visits at general practitioners and private practicing specialists was obtained from the Danish National Health Service Register.<sup>5</sup>

**Table S7. Baseline characteristics of SARS-CoV-2 positive and test-negative children and adolescents before and after propensity score weighting.**

|                                                        | SARS-CoV-2 positive<br>(n=74,611) | SARS-CoV-2 negative<br>(n=745,540) | SMD  | SARS-CoV-2 negative<br>(weighted)<br>(n=74,563) | SMD  |
|--------------------------------------------------------|-----------------------------------|------------------------------------|------|-------------------------------------------------|------|
| <b>Demographics</b>                                    |                                   |                                    |      |                                                 |      |
| Median age (IQR)                                       | 11 (7-15)                         | 11 (7-15)                          | 0.04 | 11 (7-15)                                       | 0.01 |
| Age category (years)                                   |                                   |                                    |      |                                                 |      |
| 0-1                                                    | 3,369 (4.5)                       | 24,051 (3.2)                       | 0.07 | 2,644 (3.5)                                     | 0.05 |
| 2-5                                                    | 9,665 (13)                        | 100,168 (13)                       | 0.01 | 11,171 (15)                                     | 0.06 |
| 6-11                                                   | 26,641 (36)                       | 252,231 (34)                       | 0.04 | 25,560 (34)                                     | 0.03 |
| 12-15                                                  | 21,689 (29)                       | 239,924 (32)                       | 0.07 | 22,155 (30)                                     | 0.01 |
| 16-17                                                  | 13,247 (18)                       | 129,166 (17)                       | 0.01 | 13,034 (17)                                     | 0.01 |
| Female sex                                             | 36,488 (49)                       | 376,509 (51)                       | 0.03 | 36,447 (49)                                     | 0    |
| Immigration status                                     |                                   |                                    |      |                                                 |      |
| 1st generation                                         | 4,846 (6.5)                       | 17,020 (2.3)                       | 0.21 | 4,847 (6.5)                                     | 0    |
| 2nd generation                                         | 15,571 (21)                       | 51,364 (6.9)                       | 0.41 | 15,567 (21)                                     | 0    |
| <b>Temporality</b>                                     |                                   |                                    |      |                                                 |      |
| 27 Feb 2020 to 31 Jul 2020                             | 921 (1.2)                         | 9,315 (1.2)                        | 0    | 926 (1.2)                                       | 0    |
| 01 Aug 2021 to 31 Jan 2021                             | 35,027 (47)                       | 349,707 (47)                       | 0    | 35,656 (48)                                     | 0.02 |
| 01 Feb 2021 to 30 Jun 2021                             | 20,701 (28)                       | 206,934 (28)                       | 0    | 19,735 (26)                                     | 0.03 |
| 01 Jul 2021 to 31 Oct 2021                             | 17,962 (24)                       | 179,584 (24)                       | 0    | 18,246 (24)                                     | 0.01 |
| <b>Perinatal history</b>                               |                                   |                                    |      |                                                 |      |
| Prematurity (28-37 weeks)                              | 3,182 (4.3)                       | 34,884 (4.7)                       | 0.02 | 3,272 (4.4)                                     | 0.01 |
| Immaturity (<28 weeks)                                 | NR                                | 1,699 (0.2)                        | NR   | 172 (0.2)                                       | NR   |
| Small for gestational age                              | 868 (1.2)                         | 9,248 (1.2)                        | 0.01 | 865 (1.2)                                       | 0    |
| Low birth weight (<2500g)                              | 2,160 (2.9)                       | 22,458 (3.0)                       | 0.01 | 2,162 (2.9)                                     | 0    |
| <b>Medical history</b>                                 |                                   |                                    |      |                                                 |      |
| Asthma                                                 | 4,040 (5.4)                       | 46,211 (6.2)                       | 0.03 | 4,028 (5.4)                                     | 0    |
| Other chronic respiratory diseases                     | 470 (0.6)                         | 5,167 (0.7)                        | 0.01 | 470 (0.6)                                       | 0    |
| Chronic cardiac disease                                | 362 (0.5)                         | 3,790 (0.5)                        | 0    | 359 (0.5)                                       | 0    |
| Diabetes mellitus                                      | NR                                | 2,490 (0.3)                        | NR   | 192 (0.3)                                       | NR   |
| Autoimmune disorders                                   | 854 (1.1)                         | 9,889 (1.3)                        | 0.02 | 853 (1.1)                                       | 0    |
| Epilepsy or convulsions                                | 3,159 (4.2)                       | 33,897 (4.5)                       | 0.02 | 3,159 (4.2)                                     | 0    |
| Congenital malformations and chromosomal abnormalities | 1,971 (2.6)                       | 20,205 (2.7)                       | 0    | 1,967 (2.6)                                     | 0    |
| Malignancy or immunodeficiency                         | 343 (0.5)                         | 4,112 (0.6)                        | 0.01 | 340 (0.5)                                       | 0    |
| Psychiatric disorders                                  | 4,564 (6.1)                       | 55,279 (7.4)                       | 0.05 | 4,575 (6.1)                                     | 0    |
| Number of comorbidities                                |                                   |                                    |      |                                                 |      |
| 0                                                      | 58,134 (78)                       | 564,033 (76)                       | 0.05 | 58,076 (78)                                     | 0    |
| 1                                                      | 12,254 (16)                       | 133,309 (18)                       | 0.04 | 12,240 (16)                                     | 0    |
| 2+                                                     | 4,223 (5.7)                       | 48,198 (6.5)                       | 0.03 | 4,247 (5.7)                                     | 0    |
| Hospital admissions within the last year               |                                   |                                    |      |                                                 |      |
| 0                                                      | 74,350 (100)                      | 741,852 (100)                      | 0.02 | 74,179 (99)                                     | 0.03 |
| 1                                                      | NR                                | 3,316 (0.4)                        | NR   | 346 (0.5)                                       | NR   |
| 2+                                                     | NR                                | 372 (0.0)                          | NR   | 38 (0.1)                                        | NR   |
| <b>Current drug use</b>                                |                                   |                                    |      |                                                 |      |
| Short-acting beta-2 agonists                           | 3,023 (4.1)                       | 35,912 (4.8)                       | 0.04 | 3,033 (4.1)                                     | 0    |
| Inhaled corticosteroids                                | 2,501 (3.4)                       | 29,379 (3.9)                       | 0.03 | 2,506 (3.4)                                     | 0    |
| Leukotriene D4-receptor antagonists                    | 433 (0.6)                         | 5,790 (0.8)                        | 0.02 | 435 (0.6)                                       | 0    |
| Nasal corticosteroids                                  | 3,409 (4.6)                       | 40,617 (5.4)                       | 0.04 | 3,403 (4.6)                                     | 0    |

|                          |             |              |      |             |      |
|--------------------------|-------------|--------------|------|-------------|------|
| Systemic antihistamines  | 3,508 (4.7) | 40,253 (5.4) | 0.03 | 3,514 (4.7) | 0    |
| Systemic corticosteroids | NR          | 1,867 (0.3)  | NR   | 164 (0.2)   | NR   |
| Systemic antibiotics     |             |              |      |             |      |
| 0                        | 65,820 (88) | 652,595 (88) | 0.02 | 65,751 (88) | 0    |
| 1                        | 6,130 (8.2) | 62,433 (8.4) | 0.01 | 6,150 (8.2) | 0    |
| 2+                       | 2,661 (3.6) | 30,512 (4.1) | 0.03 | 2,663 (3.6) | 0    |
| Paracetamol              | 1,705 (2.3) | 18,371 (2.5) | 0.01 | 1,703 (2.3) | 0    |
| NSAIDs                   | 1,610 (2.2) | 19,145 (2.6) | 0.03 | 1,602 (2.1) | 0    |
| Number of unique drugs   |             |              |      |             |      |
| 0                        | 41,617 (56) | 391,948 (53) | 0.06 | 40,882 (55) | 0.02 |
| 1                        | 16,411 (22) | 168,331 (23) | 0.01 | 16,739 (22) | 0.01 |
| 2+                       | 16,583 (22) | 185,261 (25) | 0.06 | 16,942 (23) | 0.01 |

Data are n(%) unless stated otherwise. Data on race and socioeconomic status are not available from our data sources. SMD=standardized mean difference. IQR=Interquartile range. NR=not reported because of Danish data protection laws. NSAIDs=non-steroidal anti-inflammatory drugs. †Defined as having redeemed a prescription for the drug of interest during one year prior to the start of follow-up.

**Table S8. Absolute risks, adjusted risk differences and risk ratios for hospital-based, diagnosis-based outcomes, and initiation of new medication during follow-up in SARS-CoV-2 positive children and a comparator cohort of SARS-CoV-2 test-negative children and adolescents.**

| Outcome                                      | SARS-CoV-2 positive |                   | SARS-CoV-2 negative |                   | RD (95% CI)          | RR 95% CI            |
|----------------------------------------------|---------------------|-------------------|---------------------|-------------------|----------------------|----------------------|
|                                              | Events              | Risk (%)          | Events              | Risk (%)          |                      |                      |
| <b>Follow-up: 30 days</b>                    |                     |                   |                     |                   |                      |                      |
| Hospital admission                           | 361/74350           | 0.49 (0.44, 0.54) | 6294/741852         | 0.85 (0.83, 0.87) | -0.38 (-0.44, -0.33) | 0.56 (0.50, 0.62)    |
| Intensive care unit admission                | 10/73187            | 0.01 (0.01, 0.03) | 268/729013          | 0.04 (0.03, 0.04) | -0.03 (-0.04, -0.01) | 0.35 (0.18, 0.66)    |
| Mechanical ventilation                       | n<5                 | NR                | 93/737835           | 0.01 (0.01, 0.02) | -                    | -                    |
| Renal replacement therapy                    | n<5                 | NR                | n<5                 | NR                | -                    | -                    |
| <b>Follow-up: 60 days</b>                    |                     |                   |                     |                   |                      |                      |
| MIS-C†                                       | 32/70666            | 0.05 (0.03, 0.06) | 22/706031           | 0.00 (0.00, 0.00) | 0.04 (0.03, 0.06)    | 11.55 (5.73, 23.28)  |
| Myocarditis                                  | 0/70693             | 0.00 (0.00, 0.01) | 11/706372           | 0.00 (0.00, 0.00) | -                    | -                    |
| Venous thromboembolism                       | n<5                 | NR                | 5/706324            | 0.00 (0.00, 0.00) | -                    | -                    |
| Pneumonia                                    | 13/66682            | 0.02 (0.01, 0.03) | 304/667536          | 0.05 (0.04, 0.05) | -0.03 (-0.04, -0.02) | 0.39 (0.22, 0.68)    |
| Guillain-Barré syndrome                      | n<5                 | NR                | n<5                 | NR                | -                    | -                    |
| Encephalitis                                 | 0/70669             | 0.00 (0.00, 0.01) | 8/706104            | 0.00 (0.00, 0.00) | -                    | -                    |
| Other neuroimmune disorders                  | 0/70681             | 0.00 (0.00, 0.01) | n<5                 | NR                | -                    | -                    |
| <b>Follow-up: 1-6 months</b>                 |                     |                   |                     |                   |                      |                      |
| Long-COVID                                   | 58/48948            | 0.12 (0.09, 0.15) | 35/489318           | 0.01 (0.00, 0.01) | 0.11 (0.08, 0.14)    | 18.15 (11.46, 28.74) |
| Short-acting beta-2 agonists                 | 608/46728           | 1.30 (1.20, 1.41) | 5892/462410         | 1.27 (1.24, 1.31) | 0.03 (-0.08, 0.14)   | 1.02 (0.94, 1.11)    |
| Inhaled corticosteroids                      | 292/47163           | 0.62 (0.55, 0.69) | 3197/468427         | 0.68 (0.66, 0.71) | -0.06 (-0.14, 0.02)  | 0.91 (0.81, 1.03)    |
| Paracetamol                                  | 338/47620           | 0.71 (0.64, 0.79) | 3965/474248         | 0.84 (0.81, 0.86) | -0.07 (-0.16, 0.01)  | 0.90 (0.81, 1.01)    |
| NSAIDs                                       | 433/47821           | 0.91 (0.82, 0.99) | 5288/474683         | 1.11 (1.08, 1.14) | -0.11 (-0.20, -0.02) | 0.90 (0.81, 0.99)    |
| Antibiotics for respiratory tract infections | 1306/44072          | 2.96 (2.81, 3.13) | 12507/435225        | 2.87 (2.82, 2.92) | 0.11 (-0.06, 0.28)   | 1.04 (0.98, 1.10)    |
| Other antibiotics                            | 790/46701           | 1.69 (1.58, 1.81) | 8341/463979         | 1.80 (1.76, 1.84) | 0.04 (-0.08, 0.17)   | 1.03 (0.95, 1.10)    |

Because of Danish legislation, counts less than five cannot be reported. Risk differences (RD) and risk ratios (RR) are propensity-score weighted estimates adjusted for age, sex, calendar time, immigration status, gestational age, comorbidities and current drug use as specified in appendix.

NR= not reported. MIS-C=Multisystem inflammatory syndrome in children. NSAIDs= non-steroidal anti-inflammatory drugs.

†MIS-C is reported as a combined endpoint of MIS-C and Kawasaki disease. The ICD-10 diagnosis code for MIS-C was not implemented in Denmark until late in the epidemic. Therefore, cases of Kawasaki disease occurring within two months of SARS-CoV-2 infection were considered as MIS-C.

**Table S9. Rates of health care services 6 months to 1 month before and 1 to 6 months after the index date in SARS-CoV-2 positive and test-negative children and adolescents.**

| Visit type            | SARS-CoV-2 positive                  |             | SARS-CoV-2 negative |              | PERR (95% CI)    |
|-----------------------|--------------------------------------|-------------|---------------------|--------------|------------------|
|                       | Baseline                             | Follow-up   | Baseline            | Follow-up    |                  |
|                       | Rate/1000 individuals (total visits) |             |                     |              |                  |
| Admission             | 22 (1094)                            | 19 (947)    | 24 (11876)          | 22 (10610)   | 0.97 (0.88-1.06) |
| Paediatric admission  | 10 (506)                             | 10 (469)    | 11 (5497)           | 10 (4674)    | 1.09 (0.95-1.23) |
| General practitioner  | 913 (44722)                          | 800 (39163) | 1,005 (491742)      | 826 (404059) | 1.07 (1.05-1.08) |
| Outpatient            | 366 (17929)                          | 369 (18064) | 421 (205813)        | 429 (209946) | 1.01 (0.97-1.05) |
| Paediatric outpatient | 57 (2783)                            | 54 (2654)   | 61 (29758)          | 61 (29696)   | 0.96 (0.90-1.01) |
| Specialist            | 159 (7783)                           | 164 (8038)  | 163 (79979)         | 167 (81871)  | 0.99 (0.96-1.02) |

Rates are reported as the number of events per 1000 individuals under 18 years during the baseline period from day -179 to -30 before testing and the post-acute follow-up from day +30 to +179 after testing. PERR=prior event rate ratio adjusted rate ratio. Admissions are defined as any physical hospital contact with a duration of 12 hours or more.

**Table S10. Demographic characteristics of Danish vaccine recipients aged 12 to 17 years**

| <b>Vaccinated adolescents</b> |                 |
|-------------------------------|-----------------|
| <b>(N=279,655)</b>            |                 |
| <b>Vaccine</b>                |                 |
| BNT162b2                      | 278,649 (99.6%) |
| mRNA-1273                     | 973 ( 0.3%)     |
| Other*                        | 33 (0.0%)       |
| Completed immunisation        | 268,508 (96.0%) |
| <b>Year of birth</b>          |                 |
| 2004                          | 56,811 (20.3%)  |
| 2005                          | 54,866 (19.6%)  |
| 2006                          | 50,255 (18.0%)  |
| 2007                          | 46,224 (16.5%)  |
| 2008                          | 42,945 (15.4%)  |
| 2009                          | 28,554 (10.2%)  |
| Male sex                      | 142,632 (51.0%) |
| <b>Region</b>                 |                 |
| Hovedstaden                   | 80,233 (28.7%)  |
| Midtjylland                   | 67,773 (24.2%)  |
| Nordjylland                   | 29,254 (10.5%)  |
| Sjælland                      | 41,336 (14.8%)  |
| Syddanmark                    | 61,059 (21.8%)  |
| <b>Immigration status</b>     |                 |
| First generation              | 8,827 ( 3.2%)   |
| Second generation             | 12,211 ( 4.4%)  |

Characteristics of all Danish vaccine recipients vaccinated against SARS-CoV-2 before or on 31 October 2021. Data on vaccination status was obtained from The Danish Vaccination Register.<sup>6</sup>

\* AZD1222 or Ad26.CoV2-S



**Table S11. Demographic characteristics on BNT162b2 vaccine recipients included in analyses**

|                           | <b>BNT162b2<br/>(first dose)</b> | <b>Unvaccinated</b> | <b>BNT162b2<br/>(second dose)</b> | <b>Unvaccinated</b> |
|---------------------------|----------------------------------|---------------------|-----------------------------------|---------------------|
|                           | N=229,799                        | N=2,296,231         | N=175,176                         | N=1,748,086         |
| <b>Year of birth</b>      |                                  |                     |                                   |                     |
| 2004                      | 47,377 (20.6%)                   | 473,207 (20.6%)     | 44,590 (25.5%)                    | 444,038 (25.4%)     |
| 2005                      | 45,985 (20.0%)                   | 459,393 (20.0%)     | 41,740 (23.8%)                    | 416,571 (23.8%)     |
| 2006                      | 41,580 (18.1%)                   | 415,537 (18.1%)     | 30,146 (17.2%)                    | 301,067 (17.2%)     |
| 2007                      | 38,334 (16.7%)                   | 383,109 (16.7%)     | 25,725 (14.7%)                    | 256,894 (14.7%)     |
| 2008                      | 35,295 (15.4%)                   | 352,802 (15.4%)     | 22,458 (12.8%)                    | 224,414 (12.8%)     |
| 2009                      | 21,228 ( 9.2%)                   | 212,183 ( 9.2%)     | 10,517 ( 6.0%)                    | 105,102 ( 6.0%)     |
|                           |                                  | 1,174,089           |                                   |                     |
| Male sex                  | 117,491 (51.1%)                  | (51.1%)             | 89,331 (51.0%)                    | 891,943 (51.0%)     |
| <b>Region</b>             |                                  |                     |                                   |                     |
| Hovedstaden               | 64,928 (28.3%)                   | 649,121 (28.3%)     | 47,764 (27.3%)                    | 476,761 (27.3%)     |
| Midtjylland               | 56,365 (24.5%)                   | 563,194 (24.5%)     | 43,586 (24.9%)                    | 435,121 (24.9%)     |
| Nordjylland               | 24,240 (10.5%)                   | 242,077 (10.5%)     | 19,031 (10.9%)                    | 189,963 (10.9%)     |
| Sjælland                  | 33,665 (14.6%)                   | 336,630 (14.7%)     | 25,315 (14.5%)                    | 253,107 (14.5%)     |
| Syddanmark                | 50,601 (22.0%)                   | 505,209 (22.0%)     | 39,480 (22.5%)                    | 393,134 (22.5%)     |
| <b>Immigration status</b> |                                  |                     |                                   |                     |
| First generation          | 6,263 ( 2.7%)                    | 131,410 ( 5.7%)     | 3,918 ( 2.2%)                     | 155,533 ( 8.9%)     |
| Second generation         | 9,045 ( 3.9%)                    | 208,059 ( 9.1%)     | 5,881 ( 3.4%)                     | 237,565 (13.6%)     |

Characteristics of BNT162 recipients and unvaccinated peers included in analyses. Recipients of the first dose were included until 02 October 2021. Recipients of the second dose were included until 02 September 2021 to ensure a follow-up of minimum 60 days.

**Table S12. Effectiveness of BNT162b2 vaccine among adolescents 12 thorough 17 years.**

|                               | BNT162b2 vaccine recipients |                   | Unvaccinated comparators |                   | Vaccine effectiveness (VE) |                 |
|-------------------------------|-----------------------------|-------------------|--------------------------|-------------------|----------------------------|-----------------|
|                               | Events (n/N)                | Risk, % (95% CI)  | Events (n/N)             | Risk, % (95% CI)  | VE (95% CI)                | IPW-VE (95% CI) |
| <b>First dose (day 0-20)</b>  |                             |                   |                          |                   |                            |                 |
| ITT                           | 778/229799                  | 0.34 (0.32, 0.36) | 17544/2296231            | 0.76 (0.75, 0.78) | 48 (44-51)                 |                 |
| Complete case**               | 778/229799                  | 0.34 (0.32, 0.36) | 15571/1429266            | 1.09 (1.07, 1.11) | 62 (59-65)                 | 62 (59-65)      |
| <b>Second dose (day 0-59)</b> |                             |                   |                          |                   |                            |                 |
| ITT                           | 359/175176                  | 0.20 (0.18, 0.23) | 50977/1748086            | 2.92 (2.89, 2.94) | 91 (90-92)                 |                 |
| Complete Case                 | 359/175176                  | 0.20 (0.18, 0.23) | 47427/1184197            | 4.00 (3.97, 4.04) | 93 (92-94)                 | 93 (93-94)      |

Vaccine effectiveness was calculated as  $(1 - \text{risk ratio}) * 100\%$ . Risk ratios were obtained using log-binomial regression adjusted for immigration status. Birth year, sex and municipality of residence was accounted for by matching vaccinated and unvaccinated individuals on these variables.

ITT: Follow up emulated the intention to treat principle, i.e. individuals were followed according to the exposure status at the start of follow up, regardless of changes in the exposure status (unvaccinated individuals being vaccinated during follow up).

Complete case analysis: Unvaccinated individuals who were vaccinated during follow up were excluded from the analysis.

IPW=IP-weighted: Inverse probability of censoring weighted, i.e. individuals who completed follow up were weighted based on selected covariates to also represent censored individuals.

**Table S13. Rates of PCR-testing against SARS-CoV-2 in vaccinated and unvaccinated adolescents**

|              | <b>Tests (N)</b> | <b>Person time<br/>(months)</b> | <b>Monthly test rate<br/>(per 1000 individuals)</b> |
|--------------|------------------|---------------------------------|-----------------------------------------------------|
| Vaccinated   | 120087           | 137334                          | 874                                                 |
| Unvaccinated | 1258490          | 1129408                         | 1114                                                |

The number of PCR-tests for SARS-CoV-2 performed per 1000 persons per month during follow-up in unvaccinated and vaccinated adolescents aged 12 through 17 years.

## References

- 1 Schmidt M, Schmidt SAJ, Sandegaard JL, Ehrenstein V, Pedersen L, Sørensen HT. The Danish National Patient Registry: a review of content, data quality, and research potential. *Clin Epidemiol* 2015; **7**: 449–90.
- 2 Pottegård A, Schmidt SAJ, Wallach-Kildemoes H, Sørensen HT, Hallas J, Schmidt M. Data Resource Profile: The Danish National Prescription Registry. *Int J Epidemiol* 2017; **46**: 798–798f.
- 3 Statistics Denmark. Quarterly number of Danish residents. Available from <https://www.statistikbanken.dk/20021>. .
- 4 Elbe S, Buckland-Merrett G. Data, disease and diplomacy: GISAID’s innovative contribution to global health. *Glob Chall Hoboken NJ* 2017; **1**: 33–46.
- 5 Andersen JS, Olivarius NDF, Krasnik A. The Danish National Health Service Register. *Scand J Public Health* 2011; **39**: 34–7.
- 6 Grove Krause T, Jakobsen S, Haarh M, Molbak K. The Danish vaccination register. *Euro Surveill Bull Eur Sur Mal Transm Eur Commun Dis Bull* 2012; **17**. DOI:10.2807/ese.17.17.20155-en.
